# Supplementary material for: Guideline Adherence of Asymptomatic Bacteriuria Could Be Improved among General Practitioners in The Netherlands: A Survey Study
Source: MDPI journal article supplement (doi:10.3390/antibiotics11010075), 2022-01-09
Supplement: s1 [file s1]

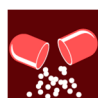

## Supplementary Materials

Table S1. Knowledge scores

| Knowledge score | n (%)     |
|-----------------|-----------|
| 2               | 6 (6.4)   |
| 3               | 24 (25.5) |
| 4               | 31 (33)   |
| 5               | 22 (23.4) |
| 6               | 11 (11.7) |

N are the number of general practitioners that earned this score

Table S2. Other reported indications for performing urine tests

| Other indications for performing urine tests specified                                                               | n=5 |
|----------------------------------------------------------------------------------------------------------------------|-----|
| Albuminuria                                                                                                          | 2   |
| All of the above mentioned reasons could be used to perform urine tests, but not in all cases                        | 1   |
| Pain in the lower abdomen                                                                                            | 1   |
| Confusion                                                                                                            | 1   |
| Control test after UTI with hematuria or when there is no improvement of symptoms after antibiotic treatment for UTI | 1   |

N are the number of general practitioners

Table S3. Other reported policies following an abnormal urine test result

| Other policies following an abnormal test result specified                                                                                                                  | n=21 |
|-----------------------------------------------------------------------------------------------------------------------------------------------------------------------------|------|
| Advices; antibiotics are only prescribed only if the patient has severe symptoms.                                                                                           | 1    |
| Antibiotics when nitrite is positive.                                                                                                                                       | 1    |
| Dipslide/urine culture if necessary or when in doubt.                                                                                                                       | 4    |
| Doctor's assistant consults GP, after which a medical policy is chosen (wait-and-see policy, antibiotic prescription or additional urine tests).                            | 2    |
| GP decides medical policy for patients in risk groups and patients with complicated UTI, for other patients a local treatment policy is followed by the doctor's assistant. | 4    |
| Medical policy depends on patient's complaints/symptoms, medical history and comorbidity.                                                                                   | 9    |
| Microscopic examination when in doubt.                                                                                                                                      | 1    |
| Patient in risk groups will have a consult with the GP, for other patients a local treatment policy is followed.                                                            | 2    |

|                                                                    |   |
|--------------------------------------------------------------------|---|
| Shared decision making between the doctor's assistant and patient. | 2 |
| Urine culture when treatment with antibiotics fails.               | 1 |
| We do not use urine dipsticks, only microscopic examination.       | 1 |

n are the number of general practitioners

**Table S4.** Other reported indications for antibiotic prescriptions

| Other indications for antibiotic prescriptions specified                            | n=11 |
|-------------------------------------------------------------------------------------|------|
| Combination of abnormal urine test results and the patient's symptoms               | 9    |
| Depends on the urine culture result                                                 | 1    |
| Patients who are ill or have severe complaints and pain medication does not suffice | 1    |
| Patients with kidney disease or pyelonephritis in medical history                   | 1    |

n are the number of general practitioners

**Supplemental File S1.** Checklist for Reporting Results of Internet E-Surveys (CHERRIES)[39]

| Item Category                                                                               | Checklist Item                           | Section, page number                                                                                                                                            |
|---------------------------------------------------------------------------------------------|------------------------------------------|-----------------------------------------------------------------------------------------------------------------------------------------------------------------|
| <b>Design</b>                                                                               | Describe survey design                   | 4.1, page 9-10.                                                                                                                                                 |
| <b>IRB (Institutional Review Board) approval and informed consent process</b>               | IRB approval                             | Back matter, page 11.                                                                                                                                           |
|                                                                                             | Informed consent                         | Back matter, page 11.                                                                                                                                           |
|                                                                                             | Data protection                          | All data were anonymously collected. Contact details were stored on a secured folder, password protected, and were accessible by the involved researchers only. |
|                                                                                             |                                          |                                                                                                                                                                 |
| <b>Development and pre-testing</b>                                                          | Development and testing                  | 4.2, page 10.                                                                                                                                                   |
| <b>Recruitment process and description of the sample having access to the questionnaire</b> | Open survey versus closed survey         | 4.1, page 9-10.                                                                                                                                                 |
|                                                                                             | Contact mode                             | 4.1, page 9-10.                                                                                                                                                 |
|                                                                                             | Advertising the survey                   | 4.1, page 9-10.                                                                                                                                                 |
|                                                                                             |                                          |                                                                                                                                                                 |
| <b>Survey administration</b>                                                                | Web/e-mail                               | 4.1, page 9-10.                                                                                                                                                 |
|                                                                                             | Context                                  | 4.1, page 9-10.                                                                                                                                                 |
|                                                                                             | Mandatory/voluntary                      | 4.1, page 9-10.                                                                                                                                                 |
|                                                                                             | Incentives                               | 4.1, page 9-10.                                                                                                                                                 |
|                                                                                             | Time/date                                | 4.1, page 9-10.                                                                                                                                                 |
|                                                                                             | Randomization of items or questionnaires | 4.2, page 10.                                                                                                                                                   |

|                                                                         |                                                                                                                            |                  |
|-------------------------------------------------------------------------|----------------------------------------------------------------------------------------------------------------------------|------------------|
|                                                                         | Adaptive question-<br>ing                                                                                                  | 4.2, page 10.    |
|                                                                         | Number of items                                                                                                            | 4.2, page 10.    |
|                                                                         | Number of screens                                                                                                          | 4.2, page 10.    |
|                                                                         | Completeness check                                                                                                         | 4.2, page 10.    |
|                                                                         | Review step                                                                                                                | 4.2, page 10.    |
| <b>Reponse rates</b>                                                    | Unique site visitor                                                                                                        | Not applicable.  |
|                                                                         | View rate (Ratio of<br>unique survey visi-<br>tors/unique site visi-<br>tors)                                              | Not applicable.  |
|                                                                         | Participation rate<br>(Ratio of unique vis-<br>itors who agreed to<br>participate/unique<br>first survey page<br>visitors) | Results, page 2. |
|                                                                         | Completion rate<br>(Ratio of users who<br>finished the sur-<br>vey/users who<br>agreed to partici-<br>pate)                | Results, page 2. |
|                                                                         |                                                                                                                            |                  |
| <b>Preventing multiple en-<br/>tries from the same indi-<br/>vidual</b> | Cookies used                                                                                                               | 4.2, page 10.    |
|                                                                         | IP check                                                                                                                   | 4.2, page 10.    |
|                                                                         | Log file analysis                                                                                                          | 4.2, page 10.    |
|                                                                         | Registration                                                                                                               |                  |
| <b>Analysis</b>                                                         | Handling of incom-<br>plete questionnaires                                                                                 | 4.3, page 10.    |
|                                                                         | Questionnaires sub-<br>mitted with an<br>atypical timestamp                                                                | 4.3, page 10.    |
|                                                                         | Statistical correction                                                                                                     | 4.3, page 10.    |
|                                                                         |                                                                                                                            |                  |
